# Supplementary material for: Phenyl doped graphitic carbon nitride nanosheets for sensing of copper ions in living cells
Source: Royal Society of Chemistry journal article supplement (doi:10.1039/d0an00795a), 2020-01-01
Supplement: d0an00795a1.pdf [file d0an00795a1.pdf]

## Supporting information

### **Green fluorescent graphitic carbon nitride nanosheets for sensing of copper ions in living cells**

Zhiping Song <sup>a</sup>, Yuan-Teng Xu <sup>b\*</sup>, Liangqia Guo <sup>a\*</sup>

<sup>a</sup> Ministry of Education Key Laboratory for Analytical Science of Food Safety and Biology, Fujian Provincial Key Laboratory of Analysis and Detection Technology for Food Safety, College of Chemistry, Fuzhou University, Fuzhou 350116, China

Email: lqguo@fzu.edu.cn

<sup>b</sup> Department of Otorhinolaryngology, First Affiliated Hospital of Fujian Medical University, Fuzhou 350005, China. E-mail: xyt973@163.com; Tel: 086-591-87982117

---

### **Preparation of PDCN nanosheets**

In a typical procedure, 10 g urea and 0.0186 g trimesic acid were dissolved in hot water. After dried at 80-90°C, the mixture was ground into powder, and then put in an alumina crucible with a cover and heated to 500°C for 2 h with a heating rate of 5 °C min<sup>-1</sup> under nitrogen protection. After cooling to room temperature, the powder was collected for further characterization and treatment.

Next, 100 mg bulk PDCN powder was refluxed in 15 mL HNO<sub>3</sub> (16 mol L<sup>-1</sup>) at 80°C for 3 h. After cooling down to room temperature, the yellow product was centrifuged at 12000 rpm for 5 min, washed with ultrapure water to neutral pH. Finally, the precipitate was sonicated in 30 mL water for 10 h. The resultant solution was centrifuged at 8000 rpm for 5 min to remove the large PDCN nanosheets. The concentration of PDCN nanosheets was approximately 900 µg mL<sup>-1</sup>.

### **Characterizations**

Absorption spectrum was obtained on a Perkin-Elmer Lambda 750 UV-Vis-NIR spectrometer. Transmission electron microscopy (TEM) image was collected with a FEI Tecnai G2F20 transmission electron microscope at an accelerating voltage of 200 kV. The thickness of PDCN nanosheets was collected by a Bruker Multimode III scanning probe microscope. X-ray photoelectron spectroscopy (XPS) spectrum was collected by a VG ESCALAB 250 X-ray photoelectron spectrometer. X-ray diffraction (XRD) pattern was investigated by a Rigaku Ultima IV diffractometer equipped with Cu K $\alpha$  radiation (40 kV,  $\lambda=1.5418\text{\AA}$ ). The particle size distribution and zeta potential of PDCN nanosheets were measured by dynamic light scattering (DLS) method using a Malvern zetasize nano-zs90 nanoparticle size potential analyzer. The fluorescent spectrum was performed on an Edinburgh Instruments FLS920 fluorescence spectrometer. The fluorescent images were taken on a Nikon C2 confocal fluorescence microscope.

### **Absolute Quantum Yield:**

The absolute quantum yield of PDCN nanosheets was determined by using an EI

---

FLS920 spectrofluorometer equipped with an integrating sphere. 3 mL dispersion solution of PDCN nanosheets was sealed in a quartz cell (10 mm × 10 mm), and its absorption intensity at 310 nm was controlled in the range of 0.15-0.40. The same volume of water was used as the blank sample. The excitation wavelength was set at 310 nm. The scattering spectral range was set from 290 nm to 360 nm, and the emission spectral range was set from 400 to 720 nm.

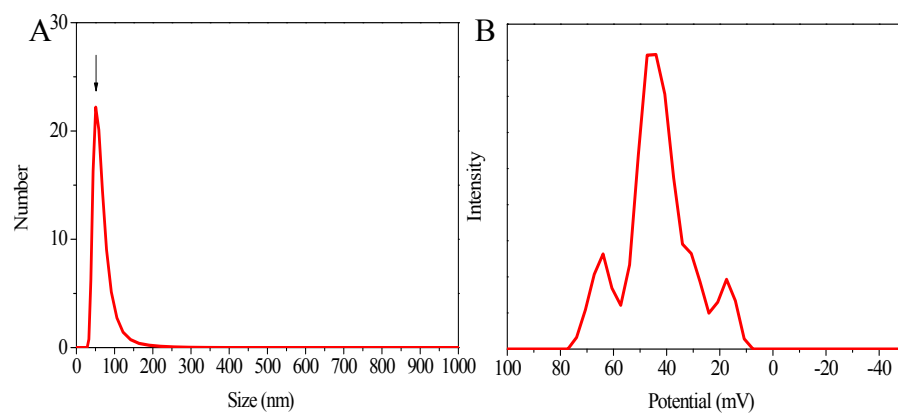

**Fig. S1.** (A) Particle size distribution and Zeta potential distribution (B) of PDCN nanosheets by dynamic light scattering

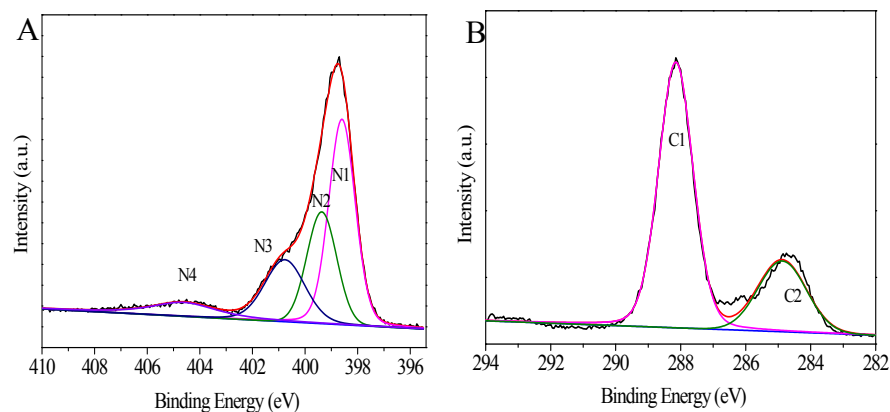

**Fig. S2.** (A) N 1s and C 1s (B) core-level XPS spectra of bulk PDCN

The C 1s core-level spectrum of bulk PDCN could be divided into two peaks at 284.7 (C2) and 288.1 e V (C1), corresponding to C-C and N-C=N, respectively. For N 1s core-level spectrum of bulk PDCN, four different peaks at 398.5 (N1), 399.3 (N2), 400.7 (N3), 404.5 eV (N4) were assigned as pyridinic nitrogen (C=N-C), pyrrolic nitrogen (C-N-C), primary amine nitrogen atoms (-NH<sub>2</sub>), and charging effects or positive charges localization in the heterocycles, respectively.

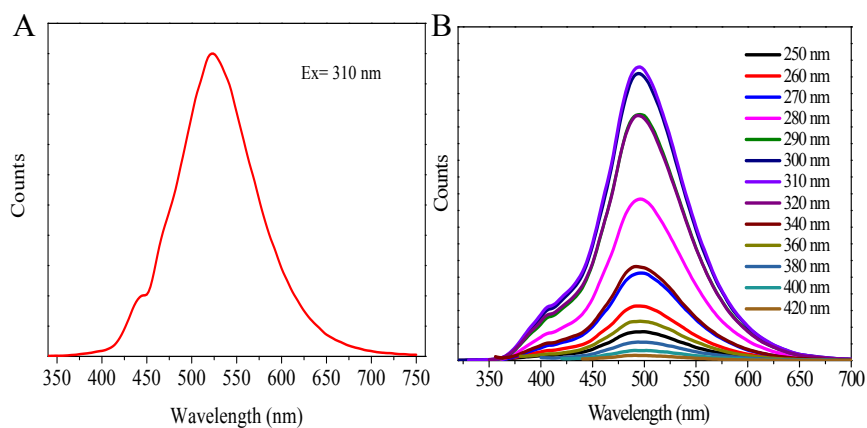

**Fig. S3.** (A) Fluorescent spectrum of bulk PDCN under excitation of 310 nm; (B) Fluorescent spectra of PDCN nanosheets dispersion under different excitation wavelength.

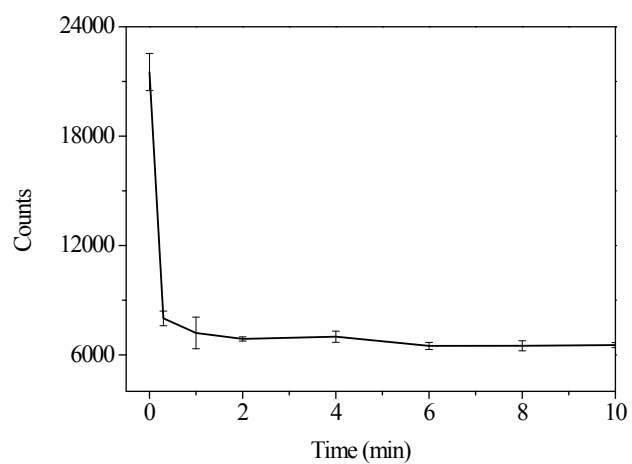

**Fig. S4.** Fluorescent intensity of PDCN nanosheets at 498 nm as a function of reaction time on addition of  $2.0 \mu\text{mol L}^{-1} \text{Cu}^{2+}$ . Error bars were calculated from three repeated measurements

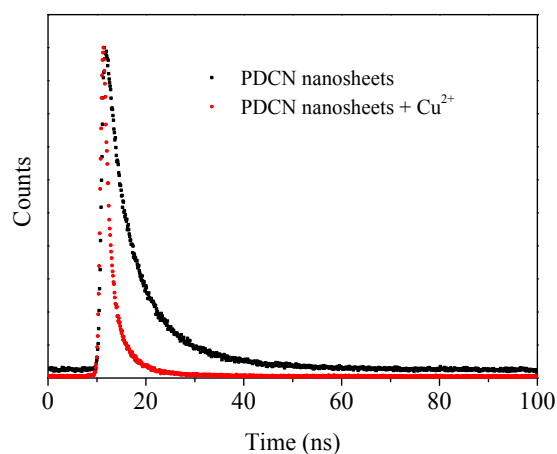

**Fig. S5.** The decay curves of PDCN nanosheets and PDCN nanosheets with  $2.0 \mu\text{mol L}^{-1} \text{Cu}^{2+}$  when excited with a 340 nm laser and emission at 500 nm.

**Table S1.** Fluorescence lifetime parameters of PDCN nanosheets before and after adding  $2 \mu\text{mol L}^{-1} \text{Cu}^{2+}$

|                                    | $\tau_1$<br>(ns) | Rel<br>(%) | $\tau_2$<br>(ns) | Rel<br>(%) | $\tau_3$<br>(ns) | Rel<br>(%) | $\chi^2$ | $\tau_{\text{average}}$<br>(ns) |
|------------------------------------|------------------|------------|------------------|------------|------------------|------------|----------|---------------------------------|
| PDCN nanosheets                    | 2.65             | 29.62      | 6.66             | 51.15      | 17.97            | 18.90      | 1.052    | 6.36                            |
| PDCN nanosheets + $\text{Cu}^{2+}$ | 1.23             | 27.84      | 3.79             | 51.71      | 12.36            | 20.45      | 1.011    | 2.73                            |

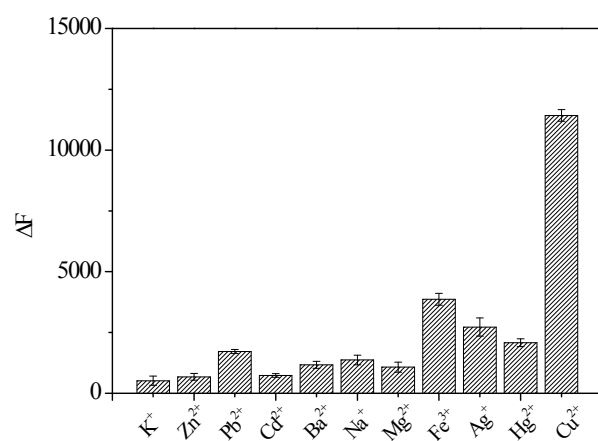

**Fig. S6.** Fluorescent quenching of PDCN nanosheets on addition of different metal ions (The concentrations of  $K^+$ ,  $Zn^{2+}$ ,  $Pb^{2+}$ ,  $Ba^{2+}$ ,  $Na^+$ ,  $Mg^{2+}$ ,  $Fe^{3+}$  are  $5.0 \mu\text{mol L}^{-1}$  and the concentrations of  $Ag^+$ ,  $Hg^{2+}$ ,  $Cu^{2+}$  are  $2.0 \mu\text{mol L}^{-1}$ )

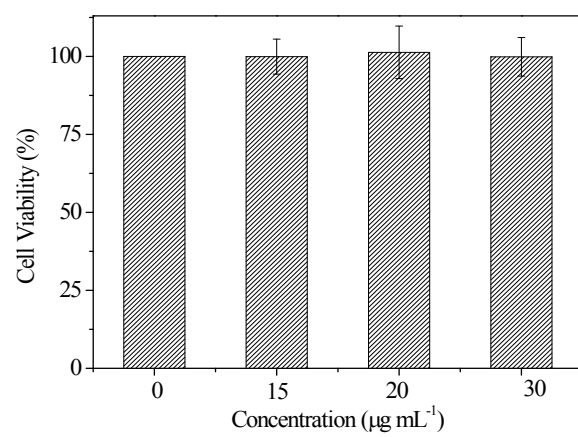

**Fig. S7** Cell viability of HeLa cells in the presence of different concentrations of PDCN nanosheets

**Table S2.** Comparison of sensing performance of different carbon nitride fluorescent probes for Cu<sup>2+</sup> detection.

| Fluorescent probes                                   | Fluorescent color | Detection limit (nmol L <sup>-1</sup> ) | Linear range (μ mol L <sup>-1</sup> ) | Ref.      |
|------------------------------------------------------|-------------------|-----------------------------------------|---------------------------------------|-----------|
| c-mpg-C <sub>3</sub> N <sub>4</sub>                  | Blue              | 12.3                                    | 0.01-0.1                              | S1        |
| Ultrathin g-C <sub>3</sub> N <sub>4</sub> nanosheets | Blue              | 0.5                                     | 0-10                                  | S2        |
| g-C <sub>3</sub> N <sub>4</sub> nanosheets           | Blue              | 0.5                                     | -                                     | S3        |
| F-g-C <sub>3</sub> N <sub>4</sub> dots               | Blue              | 0.5                                     | -                                     | S4        |
| P,O-g-C <sub>3</sub> N <sub>4</sub> nanodots         | Blue              | 2.0                                     | 0-1.0                                 | S5        |
| CNNF                                                 | Blue              | 60                                      | 0-1.0                                 | S6        |
| BCN nanosheets                                       | Blue-green        | 70                                      | 0.1-1.0                               | S7        |
| PDCN nanosheets                                      | Green             | 39                                      | 0.1-2.0                               | This work |

---

### Reference

- [S1] E. Lee, Y. Jun, W. Hong, A. Thomas and M. Jin, *Angew. Chem. Int. Ed.*, 2010, **49**, 9706-9710.
- [S2] J. Tian, Q. Liu, A. Asiri, A. Al-Youbi and X. Sun, *Anal. Chem.*, 2013, **85**, 5595-5599.
- [S3] N. Cheng, P. Jiang, Q. J. Tian, A. Asiri, X. Sun, *Analyst*, 2014, **139**, 5065-5068.
- [S4] S. Zhang, J. Li, M. Zeng, J. Xu, X. Wang and W. Hu, *Nanoscale*, 2014, **6**, 4157-4162.
- [S5] M. Rong, X. Song, T. Zhao, Q. Yao, Y. Wang and X. Chen, *J. Mater. Chem. C*, 2015, **3**, 10916-10924
- [S6] Z. Huang, F. Yan and G. Yuan, *RSC Adv.*, 2017, **7**, 1318-1325.
- [S7] L. Chen, Z. Song, X. Liu, L. Guo, M. Li and F. Fu, *Analyst*, 2018, **143**, 1609-1614.
